# Supplementary material for: RETARDATION OF RECOIL NUCLEI IN SOLID MEDIA BY THE METHOD OF NUCLEAR $gamma$-RESONANCE SCATTERING.
Source: MDPI journal article supplement (doi:10.3390/cancers15225465), 1971-01-01
Supplement: s1 [file s1]

**Supplementary Table S1. Altered metabolites between PCa vs BPH and PCa vs Met comparisons.**

| PCa VS BPH                                                       |                                                                                                                                                                 |          |          |             |                                                          |                            |                     |                       |                          |                                   |                  |                          |                                   |                  | PCa VS Met |  |  |
|------------------------------------------------------------------|-----------------------------------------------------------------------------------------------------------------------------------------------------------------|----------|----------|-------------|----------------------------------------------------------|----------------------------|---------------------|-----------------------|--------------------------|-----------------------------------|------------------|--------------------------|-----------------------------------|------------------|------------|--|--|
| Compound                                                         | Formula                                                                                                                                                         | Mass     | RT (min) | Error (ppm) | Adduct                                                   | <sup>a</sup> CV for QC (%) | Analytical platform | <sup>b</sup> ID level | <sup>c</sup> Fold Change | <sup>d</sup> p value <sup>1</sup> | <sup>e</sup> VIP | <sup>b</sup> Fold Change | <sup>d</sup> p value <sup>1</sup> | <sup>e</sup> VIP |            |  |  |
| Amino acids and analogues                                        |                                                                                                                                                                 |          |          |             |                                                          |                            |                     |                       |                          |                                   |                  |                          |                                   |                  |            |  |  |
| Hydroxyproline                                                   | C <sub>5</sub> H <sub>9</sub> NO <sub>3</sub>                                                                                                                   | 131.0583 | 0.75     | 4           | [M+H] <sup>+</sup>                                       | 2.11                       | GM-LC-QTOF-MS       | 2                     | 1.07                     | 5.38E-02 <sup>1</sup>             | 1.71             | 1.10                     | 6.09E-03 <sup>1</sup>             | 2.58             |            |  |  |
| Methylene-glutamate                                              | C <sub>6</sub> H <sub>9</sub> NO <sub>4</sub>                                                                                                                   | 159.0533 | 0.75     | 4           | [M+H] <sup>+</sup>                                       | 2.28                       | GM-LC-QTOF-MS       | 2                     | 1.06                     |                                   | 1.60             | 1.10                     | 1.02E-02 <sup>1</sup>             | 2.58             |            |  |  |
| Proline betaine                                                  | C <sub>7</sub> H <sub>13</sub> NO <sub>2</sub>                                                                                                                  | 125.0840 | 1.83     | 3           | [M+H-H <sub>2</sub> O] <sup>+</sup>                      | 8.65                       | GM-LC-QTOF-MS       | 4                     | --                       | --                                | --               | 0.49                     | --                                | 1.66             |            |  |  |
| Cysteine                                                         | C <sub>3</sub> H <sub>7</sub> NO <sub>2</sub> S                                                                                                                 | 121.197  | 13.62    | -           | -                                                        | 12.96                      | GC-QTOF-MS          | 1                     | --                       | --                                | --               | 1.28                     | --                                | 1.62             |            |  |  |
| Valine                                                           | C <sub>5</sub> H <sub>11</sub> NO <sub>2</sub>                                                                                                                  | 117.1463 | 9.11     | -           | -                                                        | 3.43                       | GC-QTOF-MS          | 1                     | --                       | --                                | --               | 1.25                     | 3.23E-02 <sup>1</sup>             | --               |            |  |  |
| Cys Thr Glu                                                      | C <sub>12</sub> H <sub>21</sub> N <sub>3</sub> O <sub>7</sub> S                                                                                                 | 373.093  | 3.43     | 4           | [M+Na] <sup>+</sup>                                      | 6.97                       | GL-LC-QTOF-MS       | 4                     | 0.32                     | 8.60E-06                          | 1.81             | --                       | --                                | --               |            |  |  |
| Glutamyl-pipecolic acid                                          | C <sub>11</sub> H <sub>18</sub> N <sub>2</sub> O <sub>5</sub>                                                                                                   | 296.0755 | 5.74     | 6           | [M+K] <sup>+</sup>                                       | 4.24                       | GL-LC-QTOF-MS       | 3                     | 0.39                     | 1.87E-05                          | 1.75             | --                       | --                                | --               |            |  |  |
| Glutamyl-hydroxyproline                                          | C <sub>10</sub> H <sub>16</sub> N <sub>2</sub> O <sub>6</sub>                                                                                                   | 298.0546 | 4.98     | 6           | [M+K] <sup>+</sup>                                       | 4.18                       | GL-LC-QTOF-MS       | 4                     | 0.28                     | 6.62E-06                          | 1.56             | --                       | --                                | --               |            |  |  |
| Methylene-glutamate/Methyl-oxoglutaramic acid/Methylnicotinamide | C <sub>6</sub> H <sub>9</sub> NO <sub>4</sub> /C <sub>7</sub> H <sub>9</sub> N <sub>2</sub> O                                                                   | 159.053  | 0.68     | 2           | [M+H] <sup>+</sup> /[M+Na] <sup>+</sup>                  | 1.61                       | GL-LC-QTOF-MS       | 3                     | --                       | --                                | --               | 1.10                     | --                                | 1.50             |            |  |  |
| Ser-Ser-OH                                                       | C <sub>12</sub> H <sub>14</sub> N <sub>2</sub> O <sub>8</sub>                                                                                                   | 314.0723 | 0.98     | 7           | [M+H] <sup>+</sup>                                       | 4.11                       | GL-LC-QTOF-MS       | 3                     | --                       | --                                | --               | 1.80                     | 3.66E-02                          | 1.66             |            |  |  |
| Carbohydrates                                                    |                                                                                                                                                                 |          |          |             |                                                          |                            |                     |                       |                          |                                   |                  |                          |                                   |                  |            |  |  |
| Gluconic acid                                                    | C <sub>6</sub> H <sub>12</sub> O <sub>7</sub>                                                                                                                   | 196.1553 | 17.49    | -           | -                                                        | 8.86                       | GC-QTOF-MS          | 1                     | 1.47                     | 3.19E-02                          | --               | --                       | --                                | --               |            |  |  |
| Methyl galactopyranoside                                         | C <sub>7</sub> H <sub>14</sub> O <sub>6</sub>                                                                                                                   | 194.1825 | 16.61    | -           | -                                                        | 7.68                       | GC-QTOF-MS          | 1                     | 1.41                     | 3.48E-02 <sup>1</sup>             | --               | --                       | --                                | --               |            |  |  |
| Palmityl-CoA                                                     | C <sub>37</sub> H <sub>66</sub> N <sub>7</sub> O <sub>17</sub> P <sub>3</sub> S                                                                                 | 1043.306 | 8.46     | 6           | [M+K] <sup>+</sup>                                       | 6.27                       | GL-LC-QTOF-MS       | 4                     | 0.57                     | 1.27E-03                          | 1.19             | --                       | --                                | --               |            |  |  |
| Cyclic acetylserotonin glucuronide                               | C <sub>18</sub> H <sub>20</sub> N <sub>2</sub> O <sub>8</sub>                                                                                                   | 430.0797 | 5.16     | 6           | [M+K] <sup>+</sup>                                       | 4.51                       | GL-LC-QTOF-MS       | 3                     | 0.37                     | 1.50E-07                          | 1.72             | --                       | --                                | --               |            |  |  |
| Fatty Acyls                                                      |                                                                                                                                                                 |          |          |             |                                                          |                            |                     |                       |                          |                                   |                  |                          |                                   |                  |            |  |  |
| Leukotriene C5                                                   | C <sub>30</sub> H <sub>45</sub> N <sub>3</sub> O <sub>9</sub> S                                                                                                 | 645.2725 | 13.71    | 6           | [M+Na] <sup>+</sup>                                      | 4.94                       | GM-LC-QTOF-MS       | 4                     | 0.58                     |                                   | 1.69             | --                       | --                                | --               |            |  |  |
| MAG 18:2/Dimethyl-pentyl-furandecanoic acid                      | C <sub>21</sub> H <sub>38</sub> O <sub>4</sub> /C <sub>21</sub> H <sub>36</sub> O <sub>3</sub>                                                                  | 336.2671 | 11.55    | 3/4         | [M+H-H <sub>2</sub> O] <sup>+</sup> /[M+H] <sup>+</sup>  | 8.35                       | GM-LC-QTOF-MS       | 4                     | 0.65                     | --                                | 1.27             | --                       | --                                | --               |            |  |  |
| Oxooctanoyl-CoA/Trimethylheptadienoyl-CoA                        | C <sub>29</sub> H <sub>48</sub> N <sub>7</sub> O <sub>18</sub> P <sub>3</sub> S/C <sub>31</sub> H <sub>48</sub> N <sub>7</sub> O <sub>19</sub> P <sub>3</sub> S | 929.1832 | 0.75     | 3/1         | [M+Na] <sup>+</sup> /[M+H-H <sub>2</sub> O] <sup>+</sup> | 4.81                       | GM-LC-QTOF-MS       | 3                     | 1.07                     | 5.24E-02 <sup>1</sup>             | 1.24             | 1.23                     | 6.09E-03 <sup>1</sup>             | 2.64             |            |  |  |
| Tetracosahexaenoic acid                                          | C <sub>24</sub> H <sub>36</sub> O <sub>2</sub>                                                                                                                  | 356.2719 | 10.79    | 3           | [M+H] <sup>+</sup>                                       | 12.93                      | GM-LC-QTOF-MS       | 3                     | 1.18                     | 5.24E-02 <sup>1</sup>             | --               | --                       | --                                | --               |            |  |  |
| Ketoleucine                                                      | C <sub>6</sub> H <sub>10</sub> O <sub>3</sub>                                                                                                                   | 130.1418 | 9.06     | -           | -                                                        | 2.27                       | GC-QTOF-MS          | 1                     | --                       | --                                | --               | 1.44                     | 4.33E-04 <sup>1</sup>             | --               |            |  |  |
| Elaidic acid                                                     | C <sub>18</sub> H <sub>34</sub> O <sub>2</sub>                                                                                                                  | 282.4614 | 20.26    | -           | -                                                        | 6.98                       | GC-QTOF-MS          | 1                     | --                       | --                                | --               | 1.40                     | --                                | 1.28             |            |  |  |
| Caproic acid                                                     | C <sub>6</sub> H <sub>12</sub> O <sub>2</sub>                                                                                                                   | 116.1583 | 6.91     | -           | -                                                        | 6.30                       | GC-QTOF-MS          | 1                     | --                       | --                                | --               | 1.33                     | 9.21E-04 <sup>1</sup>             | 1.73             |            |  |  |
| Lauric acid                                                      | C <sub>12</sub> H <sub>24</sub> O <sub>2</sub>                                                                                                                  | 200.3178 | 14.61    | -           | -                                                        | 4.51                       | GC-QTOF-MS          | 1                     | 1.11                     | 4.89E-02                          | --               | --                       | --                                | --               |            |  |  |
| Linoleic acid                                                    | C <sub>18</sub> H <sub>32</sub> O <sub>2</sub>                                                                                                                  | 280.4472 | 20.22    | -           | -                                                        | 8.86                       | GC-QTOF-MS          | 1                     | 1.31                     | 3.77E-03 <sup>1</sup>             | --               | 4.62                     | 2.27E-04 <sup>1</sup>             | --               |            |  |  |
| Myristic acid                                                    | C <sub>14</sub> H <sub>28</sub> O <sub>2</sub>                                                                                                                  | 228.3709 | 16.74    | -           | -                                                        | 4.19                       | GC-QTOF-MS          | 1                     | 1.17                     | 2.91E-02                          | --               | --                       | --                                | --               |            |  |  |
| Stearic acid                                                     | C <sub>18</sub> H <sub>36</sub> O <sub>2</sub>                                                                                                                  | 284.4772 | 20.46    | -           | -                                                        | 6.60                       | GC-QTOF-MS          | 1                     | --                       | --                                | --               | 1.10                     | --                                | 1.24             |            |  |  |
| Dehydrododecanoyl-CoA                                            | C <sub>33</sub> H <sub>56</sub> N <sub>7</sub> O <sub>17</sub> P <sub>3</sub> S                                                                                 | 929.2548 | 7.29     | 1           | [M+H-H <sub>2</sub> O] <sup>+</sup>                      | 5.09                       | GL-LC-QTOF-MS       | 4                     | 0.74                     | --                                | 1.02             | 1.68                     | --                                | 1.50             |            |  |  |

|                         |                                                                                 |          |       |    |                                                                                                |       |               |   |      |                       |      |      |          |      |
|-------------------------|---------------------------------------------------------------------------------|----------|-------|----|------------------------------------------------------------------------------------------------|-------|---------------|---|------|-----------------------|------|------|----------|------|
| Hydroxybutyryl-CoA      | C <sub>25</sub> H <sub>42</sub> N <sub>7</sub> O <sub>18</sub> P <sub>3</sub> S | 870.1732 | 6.42  | 6  | [M+NH <sub>4</sub> ] <sup>+</sup>                                                              | 6.05  | GL-LC-QTOF-MS | 2 | 0.24 | 7.85E-07 <sup>†</sup> | 1.97 | --   | --       | --   |
| Oleoyl-CoA              | C <sub>39</sub> H <sub>68</sub> N <sub>7</sub> O <sub>17</sub> P <sub>3</sub> S | 1069.322 | 12.96 | 6  | [M+K] <sup>+</sup>                                                                             | 3.67  | GL-LC-QTOF-MS | 2 | 0.35 | 1.74E-04 <sup>‡</sup> | 1.34 | --   | --       | --   |
| Oxo-dodecanoyl-CoA      | C <sub>33</sub> H <sub>56</sub> N <sub>7</sub> O <sub>18</sub> P <sub>3</sub> S | 985.249  | 12.43 | 6  | [M+Na] <sup>+</sup>                                                                            | 4.67  | GL-LC-QTOF-MS | 3 | 0.33 | 3.69E-05              | 1.46 | --   | --       | --   |
| Stearoyl-CoA            | C <sub>39</sub> H <sub>70</sub> N <sub>7</sub> O <sub>17</sub> P <sub>3</sub> S | 1071.322 | 12.96 | 10 | [M+K] <sup>+</sup>                                                                             | 4.25  | GL-LC-QTOF-MS | 4 | 0.36 | 8.63E-04              | 1.29 | --   | --       | --   |
| <b>Carnitine</b>        |                                                                                 |          |       |    |                                                                                                |       |               |   |      |                       |      |      |          |      |
| Tetradecadiencarnitine  | C <sub>21</sub> H <sub>37</sub> NO <sub>4</sub>                                 | 367.2729 | 9.60  | 3  | [M+H] <sup>+</sup>                                                                             | 9.31  | GM-LC-QTOF-MS | 2 | --   | --                    | --   | 1.21 | --       | 1.27 |
| Hexadecadienylcarnitine | C <sub>25</sub> H <sub>45</sub> NO <sub>4</sub>                                 | 423.3356 | 11.74 | 3  | [M+H] <sup>+</sup>                                                                             | 8.71  | GM-LC-QTOF-MS | 2 | 0.49 | --                    | 1.12 | --   | --       | --   |
| Decenoylcarnitine       | C <sub>17</sub> H <sub>31</sub> NO <sub>4</sub>                                 | 313.2255 | 7.72  | 2  | [M+H] <sup>+</sup>                                                                             | 9.79  | GM-LC-QTOF-MS | 2 | --   | --                    | --   | 1.32 | --       | 1.17 |
| <b>Glycerolipids</b>    |                                                                                 |          |       |    |                                                                                                |       |               |   |      |                       |      |      |          |      |
| 2-Palmitoylglycerol     | C <sub>19</sub> H <sub>38</sub> O <sub>4</sub>                                  | 330.5026 | 23.08 | -  | -                                                                                              | 17.61 | GC-QTOF-MS    | 1 | 1.06 | 3.96E-02              | --   | --   | --       | --   |
| DG 34:1                 | C <sub>37</sub> H <sub>70</sub> O <sub>5</sub>                                  | 576.5152 | 14.79 | 7  | [M+H-H <sub>2</sub> O] <sup>+</sup>                                                            | 1.02  | GL-LC-QTOF-MS | 4 | 0.74 | --                    | 1.15 | --   | --       | --   |
| DG 34:2                 | C <sub>39</sub> H <sub>66</sub> O <sub>5</sub>                                  | 614.4895 | 12.45 | 2  | [M+H] <sup>+</sup> /[M+Na] <sup>+</sup>                                                        | 2.42  | GL-LC-QTOF-MS | 3 | 0.79 | --                    | 1.10 | --   | --       | --   |
| DG 34:3                 | C <sub>37</sub> H <sub>66</sub> O <sub>5</sub>                                  | 572.4817 | 14.74 | 3  | [M+H-H <sub>2</sub> O] <sup>+</sup>                                                            | 1.05  | GL-LC-QTOF-MS | 4 | 0.77 | --                    | 1.02 | --   | --       | --   |
| DG 36:1                 | C <sub>39</sub> H <sub>74</sub> O <sub>5</sub>                                  | 604.5441 | 9.78  | 2  | [M+H-H <sub>2</sub> O] <sup>+</sup>                                                            | 2.33  | GL-LC-QTOF-MS | 4 | --   | --                    | --   | 0.83 | --       | 1.17 |
| DG 36:3                 | C <sub>39</sub> H <sub>70</sub> O <sub>5</sub>                                  | 600.5129 | 15.2  | 3  | [M+H-H <sub>2</sub> O] <sup>+</sup>                                                            | 1.03  | GL-LC-QTOF-MS | 4 | 0.80 | --                    | 1.06 | 0.79 | --       | 1.20 |
| DG 36:4                 | C <sub>39</sub> H <sub>68</sub> O <sub>5</sub>                                  | 616.5081 | 11.59 | 3  | [M+H] <sup>+</sup> /[M+Na] <sup>+</sup> /[M+NH <sub>4</sub> ] <sup>+</sup>                     | 2.14  | GL-LC-QTOF-MS | 2 | 0.65 | 3.37E-02              | 1.34 | --   | --       | --   |
| DG 46:0                 | C <sub>49</sub> H <sub>96</sub> O <sub>5</sub>                                  | 802.6817 | 13.73 | 1  | [M+K] <sup>+</sup>                                                                             | 1.12  | GL-LC-QTOF-MS | 3 | 1.68 | 1.78E-02              | --   | --   | --       | --   |
| TG 47:1                 | C <sub>50</sub> H <sub>96</sub> O <sub>5</sub>                                  | 814.6833 | 12.91 | 3  | [M+K] <sup>+</sup>                                                                             | 0.83  | GL-LC-QTOF-MS | 4 | 0.89 | --                    | 1.21 | 0.71 | 2.09E-02 | 2.40 |
| TG 50:0                 | C <sub>53</sub> H <sub>104</sub> O <sub>5</sub>                                 | 858.749  | 14.58 | 6  | [M+K] <sup>+</sup>                                                                             | 1.51  | GL-LC-QTOF-MS | 4 | 0.76 | --                    | 1.09 | --   | --       | --   |
| TG 51:4                 | C <sub>54</sub> H <sub>96</sub> O <sub>6</sub>                                  | 857.7477 | 14.58 | 1  | M+NH <sub>4</sub> /[M+Na] <sup>+</sup>                                                         | 0.58  | GL-LC-QTOF-MS | 2 | 0.76 | --                    | 1.10 | --   | --       | --   |
| TG 52:3                 | C <sub>55</sub> H <sub>100</sub> O <sub>6</sub>                                 | 873.7815 | 15.2  | 4  | [M+H] <sup>+</sup> /M+NH <sub>4</sub>                                                          | 0.19  | GL-LC-QTOF-MS | 2 | 0.94 | --                    | 1.16 | 0.90 | --       | 1.11 |
| TG 52:4                 | C <sub>55</sub> H <sub>98</sub> O <sub>6</sub>                                  | 876.721  | 14.79 | 4  | [M+H] <sup>+</sup> /[M+Na] <sup>+</sup> /[M+NH <sub>4</sub> ] <sup>+</sup>                     | 0.51  | GL-LC-QTOF-MS | 2 | 0.85 | --                    | 1.01 | --   | --       | --   |
| TG 52:5                 | C <sub>55</sub> H <sub>96</sub> O <sub>6</sub>                                  | 852.7222 | 14.46 | 2  | [M+H] <sup>+</sup> /[M+Na] <sup>+</sup> /[M+NH <sub>4</sub> ] <sup>+</sup> /[M+K] <sup>+</sup> | 0.68  | GL-LC-QTOF-MS | 2 | 0.78 | --                    | 1.14 | --   | --       | --   |
| TG 52:6                 | C <sub>55</sub> H <sub>94</sub> O <sub>6</sub>                                  | 872.6883 | 14.23 | 2  | [M+Na] <sup>+</sup> /[M+NH <sub>4</sub> ] <sup>+</sup>                                         | 1.08  | GL-LC-QTOF-MS | 2 | 0.78 | --                    | 1.02 | --   | --       | --   |
| TG 53:3                 | C <sub>56</sub> H <sub>102</sub> O <sub>6</sub>                                 | 892.7512 | 15.47 | 2  | [M+Na] <sup>+</sup>                                                                            | 0.68  | GL-LC-QTOF-MS | 2 | --   | --                    | --   | 0.85 | --       | 1.14 |
| TG 53:4                 | C <sub>56</sub> H <sub>100</sub> O <sub>6</sub>                                 | 885.78   | 14.97 | 2  | [M+NH <sub>4</sub> ] <sup>+</sup> /[M+Na] <sup>+</sup>                                         | 1.16  | GL-LC-QTOF-MS | 2 | 0.78 | --                    | 1.08 | --   | --       | --   |
| TG 53:5                 | C <sub>56</sub> H <sub>98</sub> O <sub>6</sub>                                  | 883.7626 | 14.38 | 2  | [M+Na] <sup>+</sup>                                                                            | 1.42  | GL-LC-QTOF-MS | 2 | 0.83 | --                    | 1.01 | --   | --       | --   |
| TG 54:0                 | C <sub>57</sub> H <sub>112</sub> O <sub>5</sub>                                 | 914.808  | 15.2  | 2  | [M+K] <sup>+</sup>                                                                             | 1.69  | GL-LC-QTOF-MS | 3 | --   | --                    | --   | 0.89 | --       | 1.13 |
| TG 54:1                 | C <sub>57</sub> H <sub>110</sub> O <sub>5</sub>                                 | 912.7924 | 14.79 | 2  | [M+K] <sup>+</sup>                                                                             | 1.60  | GL-LC-QTOF-MS | 2 | 0.84 | --                    | 1.23 | --   | --       | --   |
| TG 54:2                 | C <sub>57</sub> H <sub>108</sub> O <sub>5</sub>                                 | 910.7758 | 14.46 | 1  | [M+K] <sup>+</sup>                                                                             | 1.01  | GL-LC-QTOF-MS | 2 | 0.79 | --                    | 1.24 | --   | --       | --   |
| TG 54:4                 | C <sub>57</sub> H <sub>102</sub> O <sub>6</sub>                                 | 899.797  | 15.2  | 4  | [M+NH <sub>4</sub> ] <sup>+</sup>                                                              | 0.36  | GL-LC-QTOF-MS | 2 | 0.79 | --                    | 1.14 | 0.79 | --       | 1.27 |
| TG 54:5                 | C <sub>57</sub> H <sub>100</sub> O <sub>6</sub>                                 | 902.7353 | 14.79 | 2  | [M+H] <sup>+</sup> /[M+Na] <sup>+</sup> /[M+NH <sub>4</sub> ] <sup>+</sup>                     | 0.62  | GL-LC-QTOF-MS | 2 | 0.81 | --                    | 1.16 | --   | --       | --   |
| TG 54:6                 | C <sub>57</sub> H <sub>98</sub> O <sub>6</sub>                                  | 895.7649 | 14.63 | 3  | [M+Na] <sup>+</sup> /[M+NH <sub>4</sub> ] <sup>+</sup> /[M+K] <sup>+</sup>                     | 0.51  | GL-LC-QTOF-MS | 2 | 0.78 | --                    | 1.12 | 0.78 | --       | 1.03 |

|                                       |                                                                                                     |           |       |     |                                                        |       |               |   |      |                       |      |      |                       |      |
|---------------------------------------|-----------------------------------------------------------------------------------------------------|-----------|-------|-----|--------------------------------------------------------|-------|---------------|---|------|-----------------------|------|------|-----------------------|------|
| TG 55:4                               | C <sub>58</sub> H <sub>104</sub> O <sub>6</sub>                                                     | 913.8093  | 15.2  | 0   | [M+NH <sub>4</sub> ] <sup>+</sup>                      | 1.68  | GL-LC-QTOF-MS | 4 | --   | --                    | --   | 0.89 | --                    | 1.13 |
| TG 55:8                               | C <sub>58</sub> H <sub>96</sub> O <sub>6</sub>                                                      | 888.7199  | 14.59 | 0   | [M+H] <sup>+</sup>                                     | 1.00  | GL-LC-QTOF-MS | 4 | 0.84 | --                    | 1.01 | --   | --                    | --   |
| TG 56:2                               | C <sub>59</sub> H <sub>110</sub> O <sub>6</sub>                                                     | 952.7842  | 13.49 | 2   | [M+K] <sup>+</sup>                                     | 5.86  | GL-LC-QTOF-MS | 4 | 0.63 | --                    | 1.23 | --   | --                    | --   |
| TG 56:3                               | C <sub>59</sub> H <sub>110</sub> O <sub>5</sub>                                                     | 936.7916  | 14.63 | 1   | [M+K] <sup>+</sup>                                     | 1.31  | GL-LC-QTOF-MS | 3 | --   | --                    | --   | 0.84 | --                    | 1.03 |
| TG 56:5                               | C <sub>59</sub> H <sub>104</sub> O <sub>6</sub>                                                     | 946.7415  | 15.53 | 3   | [M+K] <sup>+</sup> /[M+Na] <sup>+</sup>                | 1.01  | GL-LC-QTOF-MS | 2 | --   | --                    | --   | 0.77 | --                    | 1.43 |
| TG 56:6                               | C <sub>59</sub> H <sub>102</sub> O <sub>6</sub>                                                     | 923.7958  | 14.99 | 2   | [M+Na] <sup>+</sup> /[M+NH <sub>4</sub> ] <sup>+</sup> | 0.29  | GL-LC-QTOF-MS | 2 | --   | --                    | --   | 0.71 | --                    | 1.52 |
| TG 56:7                               | C <sub>59</sub> H <sub>100</sub> O <sub>6</sub>                                                     | 926.7356  | 14.61 | 0/3 | [M+Na] <sup>+</sup> /[M+NH <sub>4</sub> ] <sup>+</sup> | 0.77  | GL-LC-QTOF-MS | 2 | 0.81 | --                    | 1.04 | 0.78 | --                    | 1.32 |
| TG 58:3                               | C <sub>61</sub> H <sub>114</sub> O <sub>5</sub>                                                     | 964.8228  | 14.99 | 1   | [M+K] <sup>+</sup>                                     | 1.16  | GL-LC-QTOF-MS | 3 | 0.86 | --                    | 1.03 | 0.78 | --                    | 1.55 |
| TG 58:4                               | C <sub>61</sub> H <sub>112</sub> O <sub>5</sub>                                                     | 962.8073  | 14.61 | 1   | [M+K] <sup>+</sup>                                     | 1.24  | GL-LC-QTOF-MS | 2 | 0.83 | --                    | 1.04 | 0.80 | --                    | 1.29 |
| TG 58:7                               | C <sub>61</sub> H <sub>104</sub> O <sub>6</sub>                                                     | 949.8113  | 14.97 | 2   | [M+NH <sub>4</sub> ] <sup>+</sup> /[M+Na] <sup>+</sup> | 0.53  | GL-LC-QTOF-MS | 2 | --   | --                    | --   | 0.76 | --                    | 1.26 |
| TG 60:11                              | C <sub>63</sub> H <sub>102</sub> O <sub>5</sub>                                                     | 976.734   | 15.2  | 6   | [M+K] <sup>+</sup>                                     | 0.81  | GL-LC-QTOF-MS | 2 | --   | --                    | --   | 0.89 | --                    | 1.14 |
| <b>Glycerophospholipids</b>           |                                                                                                     |           |       |     |                                                        |       |               |   |      |                       |      |      |                       |      |
| CDP-DG 40:4                           | C <sub>52</sub> H <sub>89</sub> N <sub>3</sub> O <sub>15</sub> P <sub>2</sub>                       | 1079.5543 | 11.86 | 4   | [M+Na] <sup>+</sup>                                    | 19.15 | GM-LC-QTOF-MS | 4 | 0.81 |                       | 2.38 | --   | --                    | --   |
| Glycerophospho Palmitoyl Ethanolamine | C <sub>21</sub> H <sub>44</sub> NO <sub>7</sub> P                                                   | 453.2867  | 12.08 | 4   | [M+H] <sup>+</sup>                                     | 9.59  | GM-LC-QTOF-MS | 2 | 0.82 | --                    | 1.34 | 0.79 | 8.22E-02 <sup>1</sup> | --   |
| LPC 15:0                              | C <sub>23</sub> H <sub>48</sub> NO <sub>7</sub> P                                                   | 481.3180  | 13.63 | 3   | [M+H] <sup>+</sup>                                     | 9.72  | GM-LC-QTOF-MS | 2 | 0.87 |                       | 1.77 | 0.74 | 9.29E-03 <sup>1</sup> | 1.90 |
| LPC 16:0                              | C <sub>24</sub> H <sub>50</sub> NO <sub>7</sub> P                                                   | 477.3227  | 12.15 | 2   | [M+H-H <sub>2</sub> O] <sup>+</sup>                    | 8.30  | GM-LC-QTOF-MS | 2 | 0.53 |                       | 2.03 | --   | --                    | --   |
| LPC 17:1/LPE 20:1                     | C <sub>25</sub> H <sub>50</sub> NO <sub>7</sub> P                                                   | 507.3336  | 11.81 | 3   | [M+H] <sup>+</sup>                                     | 9.01  | GM-LC-QTOF-MS | 3 | 0.86 | --                    | 1.38 | --   | --                    | --   |
| LPC 18:0                              | C <sub>26</sub> H <sub>54</sub> NO <sub>7</sub> P                                                   | 545.3496  | 12.16 | 8   | [M+Na] <sup>+</sup>                                    | 6.72  | GM-LC-QTOF-MS | 2 | 0.97 | --                    | 1.29 | --   | --                    | --   |
| LPC 18:1                              | C <sub>26</sub> H <sub>52</sub> NO <sub>7</sub> P                                                   | 521.3493  | 12.71 | 3   | [M+H] <sup>+</sup>                                     | 10.50 | GM-LC-QTOF-MS | 2 | 0.98 | --                    | 1.42 | --   | --                    | --   |
| LPC 18:3                              | C <sub>26</sub> H <sub>48</sub> NO <sub>7</sub> P                                                   | 517.3177  | 11.00 | 3   | [M+H] <sup>+</sup>                                     | 8.19  | GM-LC-QTOF-MS | 2 | --   | --                    | --   | 1.57 |                       | 1.84 |
| LPC 20:2                              | C <sub>28</sub> H <sub>54</sub> NO <sub>7</sub> P                                                   | 547.3653  | 12.95 | 4   | [M+H] <sup>+</sup>                                     | 9.07  | GM-LC-QTOF-MS | 2 | 0.79 |                       | 1.99 | --   | --                    | --   |
| LPC 20:3/LPC 18:0                     | C <sub>28</sub> H <sub>52</sub> NO <sub>7</sub> P/C <sub>26</sub> H <sub>54</sub> NO <sub>7</sub> P | 545.3497  | 11.61 | 5   | [M+H] <sup>+</sup> /[M+Na] <sup>+</sup>                | 9.09  | GM-LC-QTOF-MS | 3 | 0.87 |                       | 1.21 | --   | --                    | --   |
| LPC 22:4/PC O-20:1                    | C <sub>30</sub> H <sub>54</sub> NO <sub>7</sub> P/C <sub>28</sub> H <sub>56</sub> NO <sub>7</sub> P | 571.3647  | 12.73 | 4   | [M+H] <sup>+</sup> /[M+Na] <sup>+</sup>                | 8.27  | GM-LC-QTOF-MS | 3 | 0.27 |                       | 1.70 | --   | --                    | --   |
| LPC 22:5                              | C <sub>30</sub> H <sub>52</sub> NO <sub>7</sub> P                                                   | 569.3492  | 11.96 | 3   | [M+H] <sup>+</sup>                                     | 7.50  | GM-LC-QTOF-MS | 2 | 0.79 | --                    | 1.28 | --   | --                    | --   |
| LPC O-16:0                            | C <sub>24</sub> H <sub>52</sub> NO <sub>6</sub> P                                                   | 481.3544  | 12.52 | 4   | [M+H] <sup>+</sup>                                     | 10.49 | GM-LC-QTOF-MS | 2 | 0.96 | --                    | 1.73 | --   | --                    | --   |
| PA O-31:2                             | C <sub>34</sub> H <sub>65</sub> O <sub>7</sub> P                                                    | 598.4331  | 12.15 | 4   | [M+H-H <sub>2</sub> O] <sup>+</sup>                    | 12.90 | GM-LC-QTOF-MS | 4 | 0.85 | 6.23E-02 <sup>1</sup> | 2.12 | --   | --                    | --   |
| PC O-20:1                             | C <sub>28</sub> H <sub>56</sub> NO <sub>7</sub> P                                                   | 549.3804  | 14.00 | 3   | [M+H] <sup>+</sup>                                     | 8.50  | GM-LC-QTOF-MS | 3 | 0.77 | --                    | 1.30 | 0.86 |                       | 1.32 |
| Thio-PAF                              | C <sub>26</sub> H <sub>54</sub> NO <sub>6</sub> PS                                                  | 561.3210  | 13.71 | 3   | [M+Na] <sup>+</sup>                                    | 7.92  | GM-LC-QTOF-MS | 4 | 0.63 |                       | 1.58 | --   | --                    | --   |
| CL 65:4                               | C <sub>74</sub> H <sub>136</sub> O <sub>17</sub> P <sub>2</sub>                                     | 1396.88   | 14.84 | 0   | [M+K] <sup>+</sup>                                     | 7.84  | GL-LC-QTOF-MS | 4 | 0.30 | 9.98E-06              | 2.04 | --   | --                    | --   |
| LPA 20:4                              | C <sub>23</sub> H <sub>39</sub> O <sub>7</sub> P                                                    | 458.2417  | 2.67  | 2   | [M+H] <sup>+</sup>                                     | 1.70  | GL-LC-QTOF-MS | 3 | 0.88 | --                    | 1.19 | --   | --                    | --   |
| LPC 16:0                              | C <sub>24</sub> H <sub>50</sub> NO <sub>7</sub> P                                                   | 495.3337  | 2.67  | 4   | [M+H] <sup>+</sup>                                     | 1.57  | GL-LC-QTOF-MS | 2 | 0.85 | --                    | 1.28 | --   | --                    | --   |
| LPC 18:0                              | C <sub>26</sub> H <sub>54</sub> NO <sub>7</sub> P                                                   | 523.3652  | 3.94  | 4   | [M+H] <sup>+</sup>                                     | 1.70  | GL-LC-QTOF-MS | 2 | 0.81 | 4.40E-02              | 1.57 | --   | --                    | --   |

|                                                     |                                                                                                           |           |       |     |                                                         |       |               |   |      |          |      |      |          |      |
|-----------------------------------------------------|-----------------------------------------------------------------------------------------------------------|-----------|-------|-----|---------------------------------------------------------|-------|---------------|---|------|----------|------|------|----------|------|
| LPC 20:4                                            | C <sub>28</sub> H <sub>50</sub> NO <sub>7</sub> P                                                         | 543.3331  | 2.11  | 2   | [M+H] <sup>+</sup>                                      | 2.04  | GL-LC-QTOF-MS | 2 | 0.83 | --       | 1.26 | --   | --       | --   |
| LPC O-16:1                                          | C <sub>24</sub> H <sub>50</sub> NO <sub>6</sub> P                                                         | 479.338   | 3.2   | 2   | [M+H] <sup>+</sup>                                      | 3.92  | GL-LC-QTOF-MS | 2 | 0.82 | --       | 1.50 | --   | --       | --   |
| PC 34:0                                             | C <sub>42</sub> H <sub>84</sub> NO <sub>8</sub> P                                                         | 761.5946  | 12.38 | 2   | [M+H] <sup>+</sup>                                      | 1.19  | GL-LC-QTOF-MS | 2 | 0.86 | 4.40E-02 | 1.32 | 0.78 | --       | 1.87 |
| PC 38:5                                             | C <sub>46</sub> H <sub>82</sub> NO <sub>8</sub> P                                                         | 807.5798  | 8.88  | 3   | [M+H] <sup>+</sup>                                      | 0.63  | GL-LC-QTOF-MS | 2 | --   | --       | --   | 0.86 | --       | 1.34 |
| PC 40:7                                             | C <sub>48</sub> H <sub>82</sub> NO <sub>8</sub> P                                                         | 831.5785  | 8.57  | 1   | [M+H] <sup>+</sup>                                      | 1.08  | GL-LC-QTOF-MS | 2 | 0.84 | --       | 1.30 | 0.85 | --       | 1.17 |
| PC O-18:0                                           | C <sub>26</sub> H <sub>54</sub> NO <sub>7</sub> P                                                         | 523.365   | 3.67  | 3   | [M+H] <sup>+</sup>                                      | 1.55  | GL-LC-QTOF-MS | 2 | 0.81 | 4.05E-02 | 1.62 | --   | --       | --   |
| PC O-34:2                                           | C <sub>42</sub> H <sub>82</sub> NO <sub>7</sub> P                                                         | 743.5834  | 11.69 | 1   | [M+H] <sup>+</sup>                                      | 1.37  | GL-LC-QTOF-MS | 2 | --   | --       | --   | 0.74 | 4.44E-02 | 2.35 |
| PC O-36:1                                           | C <sub>44</sub> H <sub>88</sub> NO <sub>7</sub> P                                                         | 795.6157  | 12.29 | 6   | [M+Na] <sup>+</sup>                                     | 1.21  | GL-LC-QTOF-MS | 2 | 0.88 | --       | 1.10 | --   | --       | --   |
| PC O-38:4                                           | C <sub>46</sub> H <sub>86</sub> NO <sub>7</sub> P                                                         | 795.6139  | 11.78 | 0   | [M+H] <sup>+</sup>                                      | 1.60  | GL-LC-QTOF-MS | 2 | 0.87 | 4.05E-02 | 1.28 | 0.84 | --       | 1.60 |
| PC O-40:2                                           | C <sub>48</sub> H <sub>94</sub> NO <sub>7</sub> P                                                         | 865.6321  | 8.88  | 0   | [M+K] <sup>+</sup>                                      | 1.50  | GL-LC-QTOF-MS | 2 | 0.92 | --       | 1.02 | 0.87 | --       | 1.31 |
| PE 36:4                                             | C <sub>41</sub> H <sub>74</sub> NO <sub>8</sub> P                                                         | 739.5166  | 8.97  | 3   | [M+H] <sup>+</sup>                                      | 1.34  | GL-LC-QTOF-MS | 2 | --   | --       | --   | 0.65 | 2.88E-02 | 1.80 |
| PE 38:4                                             | C <sub>43</sub> H <sub>78</sub> NO <sub>8</sub> P                                                         | 767.5477  | 11.2  | 2   | [M+H] <sup>+</sup>                                      | 1.06  | GL-LC-QTOF-MS | 2 | --   | --       | --   | 0.66 | 2.88E-02 | 1.79 |
| PE 38:6                                             | C <sub>43</sub> H <sub>74</sub> NO <sub>8</sub> P                                                         | 763.5164  | 8.62  | 2   | [M+H] <sup>+</sup>                                      | 1.02  | GL-LC-QTOF-MS | 2 | --   | --       | --   | 0.62 | --       | 1.66 |
| PE 40:6                                             | C <sub>45</sub> H <sub>78</sub> NO <sub>8</sub> P                                                         | 791.5482  | 10.67 | 3   | [M+H] <sup>+</sup>                                      | 1.30  | GL-LC-QTOF-MS | 2 | --   | --       | --   | 0.72 | --       | 1.29 |
| PG 43:2                                             | C <sub>49</sub> H <sub>93</sub> O <sub>10</sub> P                                                         | 894.6349  | 13.25 | 3   | [M+Na] <sup>+</sup>                                     | 1.87  | GL-LC-QTOF-MS | 3 | --   | --       | --   | 0.96 | --       | 1.02 |
| PS 39:0                                             | C <sub>45</sub> H <sub>88</sub> NO <sub>10</sub> P                                                        | 850.6353  | 12.91 | 6   | [M+NH <sub>4</sub> ] <sup>+</sup>                       | 4.56  | GL-LC-QTOF-MS | 3 | --   | --       | --   | 0.75 | 3.71E-02 | 2.00 |
| <b>Organoheterocyclic compounds</b>                 |                                                                                                           |           |       |     |                                                         |       |               |   |      |          |      |      |          |      |
| Biliverdin                                          | C <sub>33</sub> H <sub>34</sub> N <sub>4</sub> O <sub>6</sub>                                             | 582.2484  | 9.10  | 2   | [M+H] <sup>+</sup>                                      | 13.90 | GM-LC-QTOF-MS | 3 | --   | --       | --   | 1.94 | --       | 1.17 |
| Formyl Indole                                       | C <sub>9</sub> H <sub>7</sub> NO                                                                          | 145.0529  | 2.51  | 5   | [M+H] <sup>+</sup>                                      | 9.58  | GM-LC-QTOF-MS | 2 | 0.58 | --       | 1.04 | --   | --       | --   |
| Lipoyllysine                                        | C <sub>14</sub> H <sub>26</sub> N <sub>2</sub> O <sub>3</sub> S <sub>2</sub>                              | 372.0926  | 6.42  | 4   | [M+K] <sup>+</sup>                                      | 3.87  | GL-LC-QTOF-MS | 4 | 0.36 | 1.38E-05 | 1.75 | --   | --       | --   |
| Hemin                                               | C <sub>34</sub> H <sub>32</sub> ClFeN <sub>4</sub> O <sub>4</sub>                                         | 668.168   | 5.16  | 6   | [M+NH <sub>4</sub> ] <sup>+</sup>                       | 6.18  | GL-LC-QTOF-MS | 4 | 0.46 | 1.70E-04 | 1.78 | --   | --       | --   |
| Methylxanthine/Methylmalate                         | C <sub>6</sub> H <sub>6</sub> N <sub>4</sub> O <sub>2</sub> /C <sub>5</sub> H <sub>8</sub> O <sub>5</sub> | 148.0379  | 4.44  | 1/8 | [M+H-H <sub>2</sub> O] <sup>+</sup> /[M+H] <sup>+</sup> | 7.70  | GL-LC-QTOF-MS | 3 | 0.47 | 3.80E-05 | 1.84 | --   | --       | --   |
| Tryptophanol/Dehydroxycarnitine/Aminoheptanoic acid | C <sub>10</sub> H <sub>11</sub> NO/C <sub>7</sub> H <sub>15</sub> NO <sub>2</sub>                         | 183.0659  | 2.67  | 3   | [M+Na] <sup>+</sup> /[M+K] <sup>+</sup>                 | 2.19  | GL-LC-QTOF-MS | 3 | 0.84 | --       | 1.26 | --   | --       | --   |
| <b>Indoles and derivatives</b>                      |                                                                                                           |           |       |     |                                                         |       |               |   |      |          |      |      |          |      |
| Indoleacrylic acid                                  | C <sub>11</sub> H <sub>9</sub> NO <sub>2</sub>                                                            | 187.0633  | 3.24  | 3   | [M+H] <sup>+</sup>                                      | 10.81 | GM-LC-QTOF-MS | 2 | --   | --       | --   | 1.54 | --       | 1.13 |
| Indolelactic acid                                   | C <sub>11</sub> H <sub>11</sub> NO <sub>3</sub>                                                           | 187.0634  | 2.51  | 2   | [M+H-H <sub>2</sub> O] <sup>+</sup>                     | 9.51  | GM-LC-QTOF-MS | 2 | 0.97 | --       | 1.13 | 1.27 | --       | 1.86 |
| <b>Sphingolipids</b>                                |                                                                                                           |           |       |     |                                                         |       |               |   |      |          |      |      |          |      |
| C17 Sphinganine                                     | C <sub>17</sub> H <sub>37</sub> NO <sub>2</sub>                                                           | 287.2832  | 9.65  | 5   | [M+H] <sup>+</sup>                                      | 9.78  | GM-LC-QTOF-MS | 2 | --   | --       | --   | 0.69 | --       | 1.18 |
| Ganglioside GD3 (41:1)                              | C <sub>75</sub> H <sub>135</sub> N <sub>3</sub> O <sub>29</sub>                                           | 1541.9198 | 12.15 | 1   | [M+H] <sup>+</sup>                                      | 7.91  | GM-LC-QTOF-MS | 4 | 0.81 | 1.46E-02 | 2.25 | --   | --       | --   |
| Hex(4)-HexNAc(2)-NeuAc(2)-Cer 36:1;O2               | C <sub>98</sub> H <sub>171</sub> N <sub>5</sub> O <sub>49</sub>                                           | 2184.0974 | 9.09  | 2   | [M+H-H <sub>2</sub> O] <sup>+</sup>                     | 8.94  | GM-LC-QTOF-MS | 4 | 0.40 | --       | 1.12 | --   | --       | --   |
| Hex(4)-HexNAc(3)-NeuCer 38:1;O2                     | C <sub>97</sub> H <sub>171</sub> N <sub>5</sub> O <sub>47</sub>                                           | 2140.0947 | 9.34  | 4   | [M+H-H <sub>2</sub> O] <sup>+</sup>                     | 15.24 | GM-LC-QTOF-MS | 4 | --   | --       | --   | 1.30 | --       | 1.54 |
| Hex(5)-HexNAc-NeuAc(2)-Cer 38:1;O2                  | C <sub>98</sub> H <sub>172</sub> N <sub>4</sub> O <sub>49</sub>                                           | 2171.1043 | 9.30  | 3   | [M+H-H <sub>2</sub> O] <sup>+</sup>                     | 9.59  | GM-LC-QTOF-MS | 4 | --   | --       | --   | 1.27 | --       | --   |

|                                                                  |                                                                                                                |           |       |     |                                        |       |               |   |      |                       |      |      |                       |      |
|------------------------------------------------------------------|----------------------------------------------------------------------------------------------------------------|-----------|-------|-----|----------------------------------------|-------|---------------|---|------|-----------------------|------|------|-----------------------|------|
| NeuAalpha2-3Galbeta-Cer(34:1)                                    | C <sub>51</sub> H <sub>94</sub> N <sub>2</sub> O <sub>16</sub>                                                 | 990.6675  | 12.15 | 8   | [M+H] <sup>+</sup>                     | 15.79 | GM-LC-QTOF-MS | 4 | 0.92 | 2.43E-02              | 2.40 | --   | --                    | --   |
| NeuAcHexCer 36:1;O2                                              | C <sub>53</sub> H <sub>98</sub> N <sub>2</sub> O <sub>16</sub>                                                 | 1040.6825 | 12.16 | 9   | [M+Na] <sup>+</sup>                    | 13.66 | GM-LC-QTOF-MS | 4 | 0.93 | --                    | 1.85 | --   | --                    | --   |
| Phytosphingosine                                                 | C <sub>18</sub> H <sub>39</sub> NO <sub>3</sub>                                                                | 317.2935  | 9.05  | 3   | [M+H] <sup>+</sup>                     | 10.20 | GM-LC-QTOF-MS | 2 | 0.44 | 7.33E-04 <sup>†</sup> | --   | 5.72 |                       | 1.20 |
| SM 36:2;O2/CerPE 39:2;O2                                         | C <sub>41</sub> H <sub>81</sub> N <sub>2</sub> O <sub>6</sub> P                                                | 750.5654  | 16.42 | 1   | [M+Na] <sup>+</sup>                    | 6.51  | GM-LC-QTOF-MS | 3 | 1.06 | --                    | 1.06 | --   | --                    | --   |
| CerPE 37:1;O2                                                    | C <sub>39</sub> H <sub>79</sub> N <sub>2</sub> O <sub>6</sub> P                                                | 740.5249  | 8.14  | 3   | [M+K] <sup>+</sup>                     | 1.33  | GL-LC-QTOF-MS | 3 | 0.85 | 4.32E-02              | 1.20 | 0.73 | 2.83E-02              | 2.38 |
| Hex2Cer 34:1;O2                                                  | C <sub>46</sub> H <sub>87</sub> NO <sub>13</sub>                                                               | 861.619   | 7.86  | 2   | [M+H] <sup>+</sup>                     | 1.20  | GL-LC-QTOF-MS | 2 | 0.83 | 3.41E-02              | 1.11 | --   | --                    | --   |
| HexCer 36:1;O3                                                   | C <sub>42</sub> H <sub>81</sub> NO <sub>9</sub>                                                                | 760.6222  | 8.14  | 7   | [M+NH <sub>4</sub> ] <sup>+</sup>      | 3.00  | GL-LC-QTOF-MS | 3 | 0.75 | 3.41E-02              | 1.44 | 0.64 | --                    | 2.06 |
| HexCer 42:2;O2                                                   | C <sub>48</sub> H <sub>91</sub> NO <sub>8</sub>                                                                | 809.675   | 12.93 | 1   | [M+H] <sup>+</sup>                     | 1.20  | GL-LC-QTOF-MS | 3 | --   | --                    | --   | 0.95 | --                    | 1.12 |
| SM 34:0;O2                                                       | C <sub>39</sub> H <sub>81</sub> N <sub>2</sub> O <sub>6</sub> P                                                | 704.5844  | 8.81  | 2   | [M+H] <sup>+</sup>                     | 1.14  | GL-LC-QTOF-MS | 2 | 0.87 | --                    | 1.08 | 0.60 | 2.09E-02              | 2.14 |
| SM 34:1;O2                                                       | C <sub>39</sub> H <sub>79</sub> N <sub>2</sub> O <sub>6</sub> P                                                | 702.5696  | 8.14  | 4   | [M+H] <sup>+</sup>                     | 1.12  | GL-LC-QTOF-MS | 2 | 0.84 | 3.48E-02              | 1.37 | 0.75 | --                    | 2.22 |
| SM 36:1;O2                                                       | C <sub>41</sub> H <sub>83</sub> N <sub>2</sub> O <sub>6</sub> P                                                | 730.6004  | 10.05 | 3   | [M+H] <sup>+</sup>                     | 1.31  | GL-LC-QTOF-MS | 2 | 0.85 | 6.91E-03              | 1.32 | 0.74 | --                    | 1.88 |
| SM 40:0;O2/DG 45:0                                               | C <sub>45</sub> H <sub>93</sub> N <sub>2</sub> O <sub>6</sub> P/C <sub>48</sub> H <sub>94</sub> O <sub>5</sub> | 788.67    | 12.92 | 8/6 | [M+H] <sup>+</sup> /[M+K] <sup>+</sup> | 1.29  | GL-LC-QTOF-MS | 4 | --   | --                    | --   | 0.92 | --                    | 1.16 |
| SM 40:1;O2                                                       | C <sub>43</sub> H <sub>91</sub> N <sub>2</sub> O <sub>6</sub> P                                                | 786.664   | 12.92 | 4   | [M+H] <sup>+</sup>                     | 0.67  | GL-LC-QTOF-MS | 2 | --   | --                    | --   | 0.91 | --                    | 1.18 |
| SM 41:2;O2                                                       | C <sub>46</sub> H <sub>91</sub> N <sub>2</sub> O <sub>6</sub> P                                                | 798.6624  | 12.72 | 2   | [M+H] <sup>+</sup>                     | 1.28  | GL-LC-QTOF-MS | 2 | 0.86 | --                    | 1.17 | 0.71 | 1.94E-02              | 2.48 |
| SM 42:1;O2                                                       | C <sub>47</sub> H <sub>95</sub> N <sub>2</sub> O <sub>6</sub> P                                                | 814.695   | 13.25 | 3   | [M+H] <sup>+</sup>                     | 1.03  | GL-LC-QTOF-MS | 2 | --   | --                    | --   | 0.93 | --                    | 1.07 |
| SM 42:2;O2                                                       | C <sub>47</sub> H <sub>93</sub> N <sub>2</sub> O <sub>6</sub> P                                                | 812.6794  | 12.91 | 3   | [M+H] <sup>+</sup>                     | 0.68  | GL-LC-QTOF-MS | 2 | 0.89 | --                    | 1.23 | 0.73 | 2.88E-02              | 2.35 |
| SM 42:3;O2                                                       | C <sub>47</sub> H <sub>91</sub> N <sub>2</sub> O <sub>6</sub> P                                                | 810.6623  | 12.55 | 2   | [M+H] <sup>+</sup>                     | 1.03  | GL-LC-QTOF-MS | 2 | 0.87 | --                    | 1.22 | 0.71 | 1.94E-02              | 2.38 |
| SM 43:2;O2                                                       | C <sub>48</sub> H <sub>95</sub> N <sub>2</sub> O <sub>6</sub> P                                                | 826.6939  | 13.02 | 2   | [M+H] <sup>+</sup>                     | 1.27  | GL-LC-QTOF-MS | 2 | 0.83 | --                    | 1.00 | 0.67 | 1.94E-02              | 2.09 |
| <b>Sterol Lipids</b>                                             |                                                                                                                |           |       |     |                                        |       |               |   |      |                       |      |      |                       |      |
| Chenodeoxyglycocholic acid                                       | C <sub>26</sub> H <sub>43</sub> NO <sub>5</sub>                                                                | 449.3146  | 8.16  | 2   | [M+H] <sup>+</sup>                     | 11.49 | GM-LC-QTOF-MS | 3 | --   | --                    | --   | 2.64 | --                    | 1.01 |
| Glycocholic acid                                                 | C <sub>26</sub> H <sub>43</sub> NO <sub>6</sub>                                                                | 447.2988  | 8.81  | 2   | [M+H-H <sub>2</sub> O] <sup>+</sup>    | 11.92 | GM-LC-QTOF-MS | 4 | 2.29 | 8.94E-03              | --   | 8.35 | 6.09E-03 <sup>‡</sup> | --   |
| Hydrocortisone succinate/Dehydrotestosterone glucosiduronic acid | C <sub>25</sub> H <sub>34</sub> O <sub>8</sub>                                                                 | 462.2259  | 9.65  | 2   | [M+H] <sup>+</sup>                     | 7.63  | GM-LC-QTOF-MS | 3 | 0.16 | 4.65E-02              | --   | 1.39 | --                    | --   |
| <b>Bilirubins</b>                                                |                                                                                                                |           |       |     |                                        |       |               |   |      |                       |      |      |                       |      |
| Mesobilirubinogen                                                | C <sub>33</sub> H <sub>44</sub> N <sub>4</sub> O <sub>6</sub>                                                  | 592.3260  | 9.58  | 1   | [M+H] <sup>+</sup>                     | 14.05 | GM-LC-QTOF-MS | 3 | 0.09 | 1.10E-05              | --   | 0.37 | 9.91E-03 <sup>‡</sup> | --   |
| Urobilinogen                                                     | C <sub>33</sub> H <sub>48</sub> N <sub>4</sub> O <sub>6</sub>                                                  | 596.3573  | 9.59  | 1   | [M+H] <sup>+</sup>                     | 12.96 | GM-LC-QTOF-MS | 3 | 1.49 | 5.31E-03              | --   | 0.18 | 6.09E-03 <sup>‡</sup> | 2.33 |
| <b>Others</b>                                                    |                                                                                                                |           |       |     |                                        |       |               |   |      |                       |      |      |                       |      |
| Inosine cyclic phosphate                                         | C <sub>10</sub> H <sub>11</sub> N <sub>4</sub> O <sub>7</sub> P                                                | 330.0377  | 0.68  | 5   | [M+H] <sup>+</sup>                     | 1.73  | GL-LC-MS      | 3 | --   | --                    | --   | 1.11 | 4.81E-02              | 2.10 |
| UDP-acetyl-(carboxyvinyl)-glucosamine                            | C <sub>20</sub> H <sub>29</sub> N <sub>3</sub> O <sub>19</sub> P <sub>2</sub>                                  | 659.0740  | 0.73  | 3   | [M+H-H <sub>2</sub> O] <sup>+</sup>    | 1.39  | GM-LC-QTOF-MS | 4 | --   | --                    | --   | 1.12 | 6.09E-03 <sup>‡</sup> | 2.88 |

RT: retention time; <sup>‡</sup>CV, coefficient of variation in the metabolites in the QC samples; <sup>‡</sup>Identification level: Level 1 Structure confirmed, Level 2 Structure probable, Level 3 Unequivocal molecular formula (s), Level 4 Exact mass; <sup>†</sup>Fold Change, change in the abundance of the specified comparison calculated as (case/control); <sup>‡</sup>p value<sup>‡</sup> corresponding to the *p* values calculated by the Benjamini-Hochberg false discovery rate post hoc correction (FDR < 0.05); <sup>‡</sup>VIP, variable importance in projection. GM: global metabolomics, GL: global lipidomics, LC: liquid chromatography, GC: gas chromatography, QTOF-MS: quadrupole time-of-flight mass spectrometer.

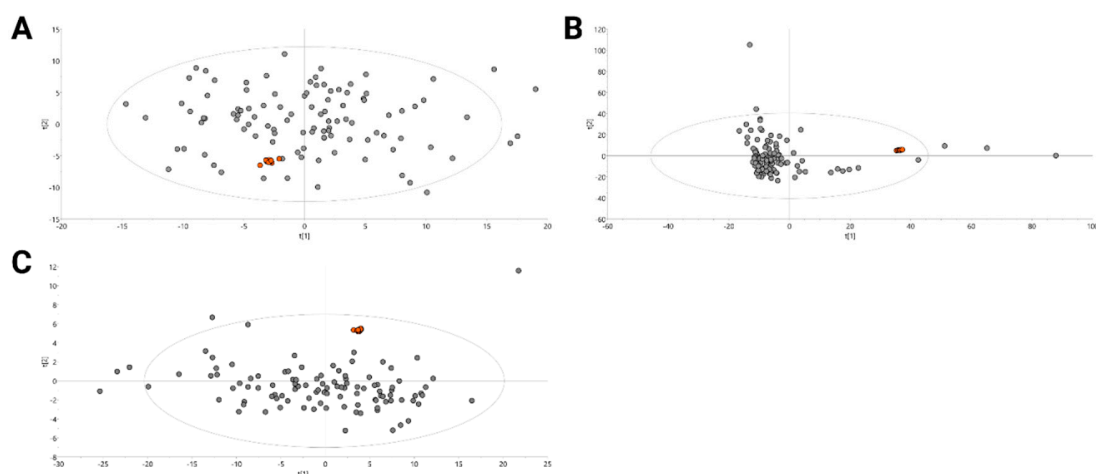

**Figure S1. PCA models for metabolic and lipidomic analysis.** (A) GM(+):  $R^2: 0.673$ , (B) GL(+):  $R^2: 0.928$ ; (C) GC:  $R^2: 0.71$ . Dots in orange denote quality control, gray dots correspond to samples.

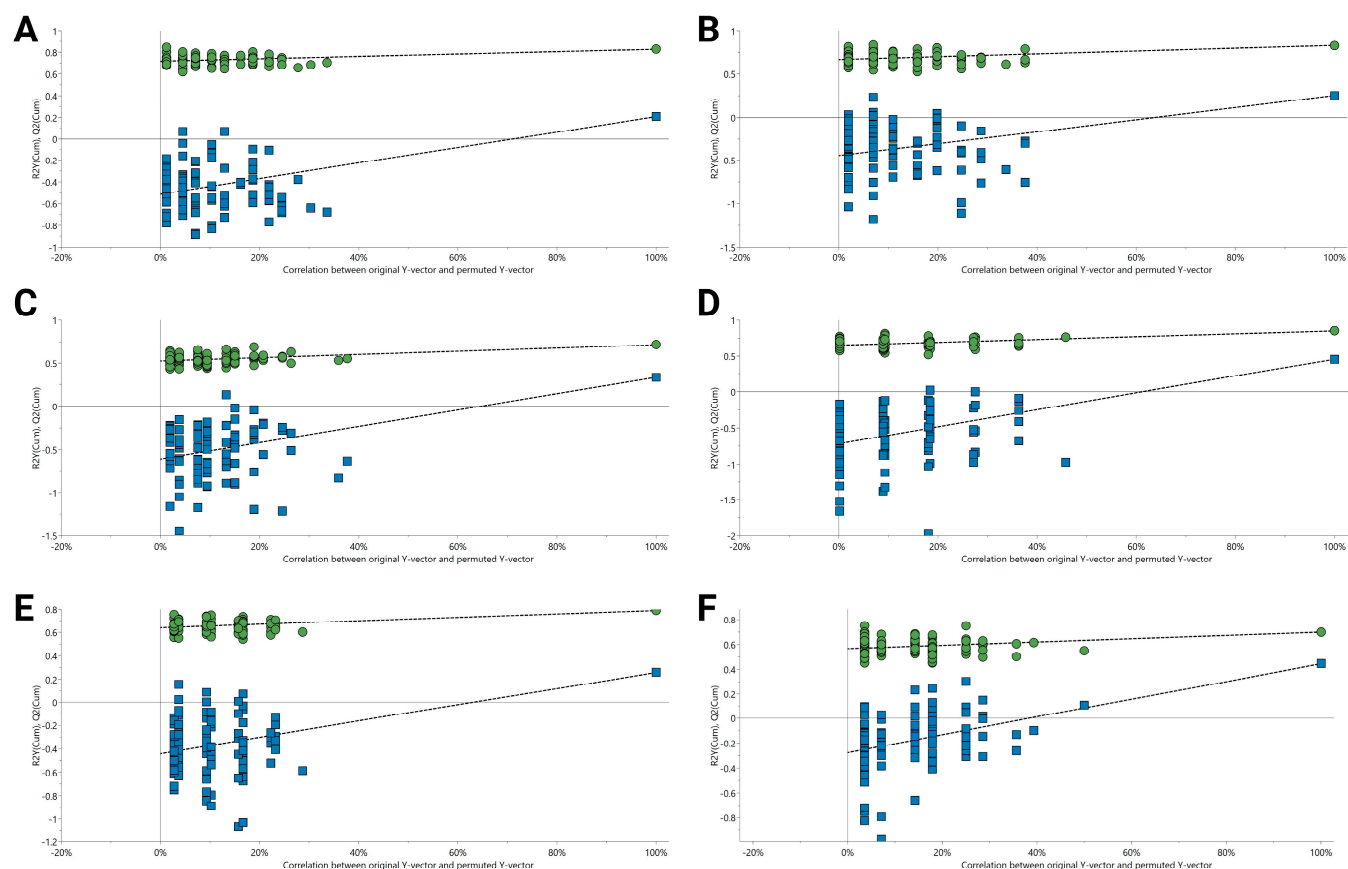

**Figure S2. OPLS-DA permutation test plots.** (A,C,E): BPHvsPCa, (B,D,F): PCavsMET. (A,B) GM(+), (C,D) GL(+), (E,F) GC. Dots in green correspond to  $R^2$ , squares in blue denote  $Q^2$ .

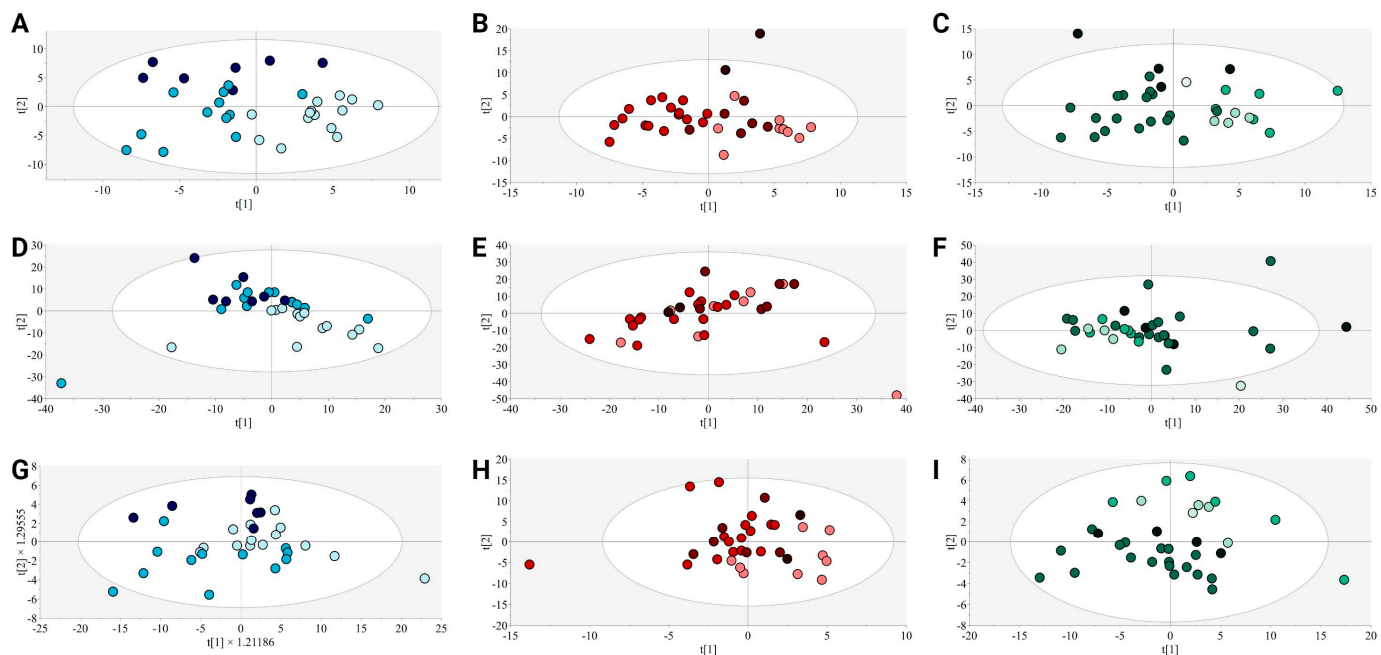

**Figure S3. PLSDA Models for comparisons regarding PSA, TNM, and Gleason score classifications.**

(A–C): GM(+). (D–F): GL(+). (G–I): GC. (A,D,G): PSA classifications. (B,E,H): Gleason score, (C,F,I): TNM score. (A)  $R^2$ : 0.551,  $Q^2$ : -0.21, cv-ANOVA: 1. (B)  $R^2$ : 0.479,  $Q^2$ : -0.125, cv-ANOVA: 0.96. (C)  $R^2$ : 0.322,  $Q^2$ : -0.05, cv-ANOVA: 1. (D)  $R^2$ : 0.255,  $Q^2$ : -0.045, cv-ANOVA: 0.89. (E)  $R^2$ : 0.491,  $Q^2$ : -0.159, cv-ANOVA: 1. (F)  $R^2$ : 0.124,  $Q^2$ : -0.118, cv-ANOVA: 1. (G)  $R^2$ : 0.366,  $Q^2$ : -0.088, cv-ANOVA: 1. (H)  $R^2$ : 0.191,  $Q^2$ : -0.099, cv-ANOVA: 0.85. (I)  $R^2$ : 0.248,  $Q^2$ : 0.0671, cv-ANOVA: 1. The points classify the samples into descending color gradients as follows: Blue gradient (PSA): >20, 10-20, <10; Red gradient (Gleason Score): 9, 8, 7, 6; Green gradient (TNM Score): T2c, T2b, T2a, T1c, T1b.
